# Supplementary material for: SRC-1 Regulates Blood Pressure and Aortic Stiffness in Female Mice
Source: PubMed Central journal article supplement (PMC5179266; doi:10.1371/journal.pone.0168644), 2016-12-22
Supplement: pone.0168644.s001.pdf [file pone.0168644.s001.pdf]

**SRC-1 Regulates Blood Pressure and Aortic Stiffness in Female Mice**  
 Antentor Othrell Hinton Jr., Yongjie Yang, Ann P. Quick, Pingwen Xu, Chitra L. Reddy,  
 Xiaofeng Yan, Corey L. Reynolds, Qingchun Tong, Liangru Zhu, Jianming Xu, Xander H.  
 T. Wehrens, Yong Xu, Anilkumar K. Reddy

**Supporting Information**

**S1 Dataset. Aortic blood pressure indices, heart rate, and rate pressure product.** Individual data samples of systolic blood pressure, diastolic blood pressure, mean blood pressure, pulse pressure, heart rate, and rate pressure product (systolic blood pressure x heart rate) of female WT and SRC-1-KO mice (dataset for Figure 3).

| Mouse            | Systolic BP  | Diastolic BP | Mean BP     | Pulse Pressure | Heart Rate | Rate x Systolic BP |
|------------------|--------------|--------------|-------------|----------------|------------|--------------------|
| Genotype         | (mmHg)       | (mmHg)       | (mmHg)      | (mmHg)         | (bpm)      | (bpm x mmHg)       |
| <b>WT1</b>       | <b>102.7</b> | <b>71.7</b>  | <b>86.5</b> | <b>31.0</b>    | <b>451</b> | <b>46318</b>       |
| <b>WT2</b>       | <b>98.8</b>  | <b>65.8</b>  | <b>81.5</b> | <b>33.1</b>    | <b>448</b> | <b>44271</b>       |
| <b>WT3</b>       | <b>104.9</b> | <b>71.9</b>  | <b>86.9</b> | <b>33.0</b>    | <b>461</b> | <b>48340</b>       |
| <b>WT4</b>       | <b>114.2</b> | <b>75.7</b>  | <b>93.4</b> | <b>38.4</b>    | <b>451</b> | <b>51483</b>       |
| <b>SRC-1 KO1</b> | <b>112.2</b> | <b>74.8</b>  | <b>90.7</b> | <b>37.4</b>    | <b>481</b> | <b>53944</b>       |
| <b>SRC-1 KO2</b> | <b>119.7</b> | <b>79.9</b>  | <b>99.2</b> | <b>39.8</b>    | <b>507</b> | <b>60693</b>       |
| <b>SRC-1 KO3</b> | <b>111.2</b> | <b>77.1</b>  | <b>93.2</b> | <b>34.1</b>    | <b>484</b> | <b>53806</b>       |
| <b>SRC-1 KO4</b> | <b>114.7</b> | <b>77.2</b>  | <b>94.9</b> | <b>37.5</b>    | <b>444</b> | <b>50916</b>       |
| <b>SRC-1 KO5</b> | <b>105.3</b> | <b>74.8</b>  | <b>88.9</b> | <b>30.6</b>    | <b>473</b> | <b>49811</b>       |
| <b>SRC-1 KO6</b> | <b>113.7</b> | <b>79.4</b>  | <b>95.3</b> | <b>34.3</b>    | <b>537</b> | <b>61057</b>       |
