# Supplementary material for: SRC-1 Regulates Blood Pressure and Aortic Stiffness in Female Mice
Source: PubMed Central journal article supplement (PMC5179266; doi:10.1371/journal.pone.0168644), 2016-12-22
Supplement: pone.0168644.s002.pdf [file pone.0168644.s002.pdf]

# SRC-1 Regulates Blood Pressure and Aortic Stiffness in Female Mice

Antentor Othrell Hinton Jr., Yongjie Yang, Ann P. Quick, Pingwen Xu, Chitra L. Reddy, Xiaofeng Yan, Corey L. Reynolds, Qingchun Tong, Liangru Zhu, Jianming Xu, Xander H. T. Wehrens, Yong Xu, Anilkumar K. Reddy

## Supporting Information

**S2 Dataset. Left ventricular pressure indices and maximal rates of contraction and relaxation.** Individual data samples of peak left ventricular pressure, maximal +dP/dt, maximal -dP/dt, relaxation time constant (tau), and left ventricular end diastolic pressure (LVEDP) of female WT and SRC-1-KO mice (dataset for Figure 4).

| Mouse Genotype | Peak LV Pressure (mmHg) | +dP/dtmax (mmHg/s) | -dP/dtmax (mmHg/s) | tau (ms) | LVEDP (mmHg) |
|----------------|-------------------------|--------------------|--------------------|----------|--------------|
| WT1            | 101.8                   | 7875               | 7914               | 8.65     | 6.8          |
| WT2            | 101.0                   | 9861               | 8675               | 6.76     | 4.8          |
| WT3            | 93.3                    | 7102               | 6871               | 9.21     | 10.8         |
| WT4            | 112.4                   | 9788               | 9948               | 7.26     | 4.9          |
| SRC-1 KO1      | 116.6                   | 11063              | 10821              | 5.62     | 5.8          |
| SRC-1 KO2      | 106.8                   | 8246               | 8724               | 10.44    | 6.7          |
| SRC-1 KO3      | 112.2                   | 11536              | 10885              | 7.03     | 3.7          |
| SRC-1 KO4      | 116.4                   | 9385               | 8731               | 9.07     | 5.8          |
| SRC-1 KO5      | 98.9                    | 8965               | 7874               | 8.73     | 8.5          |
| SRC-1 KO6      | 109.4                   | 10852              | 12376              | 6.11     | 5.5          |
