# Supplementary material for: SRC-1 Regulates Blood Pressure and Aortic Stiffness in Female Mice
Source: PubMed Central journal article supplement (PMC5179266; doi:10.1371/journal.pone.0168644), 2016-12-22
Supplement: pone.0168644.s003.pdf [file pone.0168644.s003.pdf]

**SRC-1 Regulates Blood Pressure and Aortic Stiffness in Female Mice**  
Antentor Othrell Hinton Jr., Yongjie Yang, Ann P. Quick, Pingwen Xu, Chitra L. Reddy,  
Xiaofeng Yan, Corey L. Reynolds, Qingchun Tong, Liangru Zhu, Jianming Xu, Xander H.  
T. Wehrens, Yong Xu, Anilkumar K. Reddy

**Supporting Information**

**S3 Dataset. Aortic arch diameters.** Individual data samples of aortic arch diameter of female WT and SRC-1-KO mice (dataset for Figure 5).

| Mouse            | Aortic Diameter |
|------------------|-----------------|
| Genotype         | (mm)            |
| <b>WT1</b>       | <b>1.551</b>    |
| <b>WT2</b>       | <b>1.568</b>    |
| <b>WT3</b>       | <b>1.605</b>    |
| <b>SRC-1 KO1</b> | <b>1.494</b>    |
| <b>SRC-1 KO2</b> | <b>1.477</b>    |
| <b>SRC-1 KO3</b> | <b>1.424</b>    |
