# Supplementary material for: SRC-1 Regulates Blood Pressure and Aortic Stiffness in Female Mice
Source: PubMed Central journal article supplement (PMC5179266; doi:10.1371/journal.pone.0168644), 2016-12-22
Supplement: pone.0168644.s004.pdf [file pone.0168644.s004.pdf]

# **SRC-1 Regulates Blood Pressure and Aortic Stiffness in Female Mice**

Antentor Othrell Hinton Jr., Yongjie Yang, Ann P. Quick, Pingwen Xu, Chitra L. Reddy, Xiaofeng Yan, Corey L. Reynolds, Qingchun Tong, Liangru Zhu, Jianming Xu, Xander H. T. Wehrens, Yong Xu, Anilkumar K. Reddy

## **Supporting Information**

**S4 Dataset. Doppler flow velocity indices in the heart.** Individual data samples of peak aortic flow velocity, peak mitral early (E) flow velocity, peak atrial (A) flow velocity, and E/A peak flow velocity ratio of female WT and SRC-1-KO mice (dataset for Figure 6).

| Mouse Genotype | Pk Aortic Vel. (cm/s) | Pk E-Vel. (cm/s) | Pk A-Vel. (cm/s) | E/A Ratio |
|----------------|-----------------------|------------------|------------------|-----------|
| WT1            | 91.7                  | 51.6             | 38.5             | 1.3       |
| WT2            | 117.7                 | 58.5             | 42.6             | 1.4       |
| WT3            | 87.1                  | 46.6             | 41.5             | 1.1       |
| WT4            | 98.5                  | 53.8             | 49.1             | 1.1       |
| SRC-1 KO1      | 84.3                  | 55.5             | 43.2             | 1.3       |
| SRC-1 KO2      | 106.8                 | 53.8             | 33.4             | 1.6       |
| SRC-1 KO3      | 94.4                  | 49.5             | 47.1             | 1.1       |
| SRC-1 KO4      | 108.1                 | 47.1             | 34.2             | 1.4       |
| SRC-1 KO5      | 90.0                  | 56.7             | 45.9             | 1.2       |
| SRC-1 KO6      | 102.8                 | 46.9             | 44.4             | 1.1       |
