# Supplementary material for: SRC-1 Regulates Blood Pressure and Aortic Stiffness in Female Mice
Source: PubMed Central journal article supplement (PMC5179266; doi:10.1371/journal.pone.0168644), 2016-12-22
Supplement: pone.0168644.s005.pdf [file pone.0168644.s005.pdf]

**SRC-1 Regulates Blood Pressure and Aortic Stiffness in Female Mice**  
 Antentor Othrell Hinton Jr., Yongjie Yang, Ann P. Quick, Pingwen Xu, Chitra L. Reddy,  
 Xiaofeng Yan, Corey L. Reynolds, Qingchun Tong, Liangru Zhu, Jianming Xu, Xander H.  
 T. Wehrens, Yong Xu, Anilkumar K. Reddy

**Supporting Information**

**S5 Dataset. Aortic impedance indices.** Individual data samples of peripheral vascular resistance ( $Z_p$ ), impedance at first harmonic ( $Z_1$ ), characteristic impedance ( $Z_c$ ), impedance based pulse wave velocity ( $PWV_z$ ), and foot-to-foot based pulse wave velocity ( $PWV_{ff}$ ) of female WT and SRC-1-KO mice (dataset for Figure 7).

| Mouse            | $Z_p$                     | $Z_1$                     | $Z_c$                     | $PWV_z$    | $PWV_{ff}$ |
|------------------|---------------------------|---------------------------|---------------------------|------------|------------|
| Genotype         | (mmHg·s/cm <sup>5</sup> ) | (mmHg·s/cm <sup>5</sup> ) | (mmHg·s/cm <sup>5</sup> ) | cm/s       | cm/s       |
| <b>WT1</b>       | <b>367</b>                | <b>30.1</b>               | <b>18.2</b>               | <b>446</b> | <b>391</b> |
| <b>WT2</b>       | <b>249</b>                | <b>25.2</b>               | <b>14.2</b>               | <b>348</b> | <b>380</b> |
| <b>WT3</b>       | <b>387</b>                | <b>33.7</b>               | <b>17.0</b>               | <b>417</b> | <b>381</b> |
| <b>WT4</b>       | <b>389</b>                | <b>36.3</b>               | <b>16.2</b>               | <b>397</b> | <b>400</b> |
| <b>SRC-1 KO1</b> | <b>526</b>                | <b>48.4</b>               | <b>25.4</b>               | <b>538</b> | <b>469</b> |
| <b>SRC-1 KO2</b> | <b>364</b>                | <b>36.6</b>               | <b>23.6</b>               | <b>500</b> | <b>389</b> |
| <b>SRC-1 KO3</b> | <b>476</b>                | <b>40.7</b>               | <b>21.1</b>               | <b>447</b> | <b>398</b> |
| <b>SRC-1 KO4</b> | <b>495</b>                | <b>38.8</b>               | <b>19.9</b>               | <b>422</b> | <b>370</b> |
| <b>SRC-1 KO5</b> | <b>470</b>                | <b>43.0</b>               | <b>26.5</b>               | <b>562</b> | <b>443</b> |
| <b>SRC-1 KO6</b> | <b>-</b>                  | <b>-</b>                  | <b>-</b>                  | <b>-</b>   | <b>459</b> |
