# Supplementary material for: SRC-1 Regulates Blood Pressure and Aortic Stiffness in Female Mice
Source: PubMed Central journal article supplement (PMC5179266; doi:10.1371/journal.pone.0168644), 2016-12-22
Supplement: pone.0168644.s006.pdf [file pone.0168644.s006.pdf]

**SRC-1 Regulates Blood Pressure and Aortic Stiffness in Female Mice**  
**Antentor Othrell Hinton Jr., Yongjie Yang, Ann P. Quick, Pingwen Xu, Chitra L. Reddy, Xiaofeng Yan, Corey L. Reynolds, Qingchun Tong, Liangru Zhu, Jianming Xu, Xander H. T. Wehrens, Yong Xu, Anilkumar K. Reddy**

**Supporting Information**

**S6 Dataset. Echocardiographic indices.** Individual data samples of left ventricular internal diameter-systole (Ds), left ventricular internal diameter-diastole (Dd), stroke volume (SV), ejection fraction (EF), fractional shortening (FS), left ventricular anterior wall thickness-diastole (LVAWd), left ventricular internal diameter-diastole (LVIDd), left ventricular posterior wall thickness-diastole (LVPWd), left ventricular anterior wall thickness-systole (LVAWs), left ventricular internal diameter-systole (LVIDs), left ventricular posterior wall thickness-systole (LVPWs), and heart rate of female WT and SRC-1-KO mice (dataset for Table 1).

| Mouse            | Ds          | Dd          | SV          | EF          | FS          | LVAWd        | LVIDd       | LVPwd        | LVAWs        | LVIDs       | LVPWs       | Echo Heart |
|------------------|-------------|-------------|-------------|-------------|-------------|--------------|-------------|--------------|--------------|-------------|-------------|------------|
| Genotype         | (mm)        | (mm)        | ( $\mu$ l)  | (%)         | (%)         | (mm)         | (mm)        | (mm)         | (mm)         | (mm)        | (mm)        | Rate (bpm) |
| <b>WT1</b>       | <b>1.94</b> | <b>3.40</b> | <b>35.6</b> | <b>74.5</b> | <b>42.8</b> | <b>0.642</b> | <b>3.35</b> | <b>0.795</b> | <b>0.783</b> | <b>2.06</b> | <b>1.30</b> | <b>534</b> |
| <b>WT2</b>       | <b>2.33</b> | <b>3.78</b> | <b>42.2</b> | <b>69.3</b> | <b>38.3</b> | <b>0.752</b> | <b>3.72</b> | <b>0.793</b> | <b>0.853</b> | <b>2.47</b> | <b>1.18</b> | <b>461</b> |
| <b>WT3</b>       | <b>2.14</b> | <b>3.59</b> | <b>38.9</b> | <b>71.9</b> | <b>40.5</b> | <b>0.697</b> | <b>3.53</b> | <b>0.794</b> | <b>0.818</b> | <b>2.26</b> | <b>1.24</b> | <b>497</b> |
| <b>WT4</b>       | <b>2.06</b> | <b>3.38</b> | <b>33.1</b> | <b>70.7</b> | <b>39.1</b> | <b>0.760</b> | <b>3.31</b> | <b>0.870</b> | <b>0.940</b> | <b>2.13</b> | <b>1.23</b> | <b>482</b> |
| <b>SRC-1 KO1</b> | <b>2.18</b> | <b>3.42</b> | <b>32.3</b> | <b>67.1</b> | <b>36.3</b> | <b>0.559</b> | <b>3.41</b> | <b>0.740</b> | <b>0.680</b> | <b>2.27</b> | <b>1.06</b> | <b>482</b> |
| <b>SRC-1 KO2</b> | <b>1.95</b> | <b>3.30</b> | <b>32.4</b> | <b>72.2</b> | <b>41.1</b> | <b>0.620</b> | <b>3.20</b> | <b>0.846</b> | <b>0.733</b> | <b>2.05</b> | <b>1.23</b> | <b>575</b> |
| <b>SRC-1 KO3</b> | <b>1.94</b> | <b>3.49</b> | <b>38.9</b> | <b>76.8</b> | <b>44.5</b> | <b>0.664</b> | <b>3.51</b> | <b>0.744</b> | <b>0.833</b> | <b>2.07</b> | <b>1.36</b> | <b>493</b> |
| <b>SRC-1 KO4</b> | <b>1.69</b> | <b>3.20</b> | <b>32.9</b> | <b>79.9</b> | <b>47.3</b> | <b>0.752</b> | <b>3.15</b> | <b>0.870</b> | <b>0.831</b> | <b>1.83</b> | <b>1.35</b> | <b>524</b> |
| <b>SRC-1 KO5</b> | <b>1.86</b> | <b>3.32</b> | <b>34.4</b> | <b>76.3</b> | <b>44.0</b> | <b>0.746</b> | <b>3.26</b> | <b>0.870</b> | <b>0.879</b> | <b>1.97</b> | <b>1.42</b> | <b>600</b> |
| <b>SRC-1 KO6</b> | <b>2.07</b> | <b>3.61</b> | <b>41.0</b> | <b>74.7</b> | <b>42.7</b> | <b>0.720</b> | <b>3.57</b> | <b>1.050</b> | <b>0.875</b> | <b>2.25</b> | <b>1.21</b> | <b>512</b> |
